# Supplementary material
Source: Springer Nature journal article supplement (https://www.springermedizin.de/resource/supplementary/12877_2013_939_MOESM1_ESM.pdf/9440472)

Percent improvement in verbal memory performance over 1 year of cardiac rehabilitation (CR) in subjects with low and high C22:0 and C24:0 concentrations

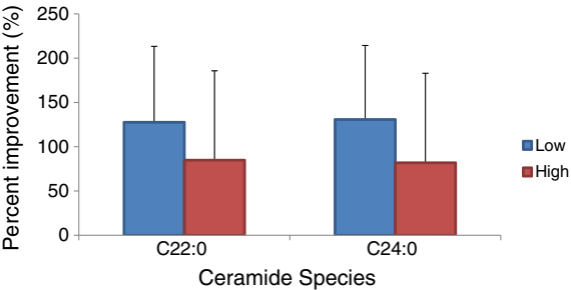

Supplement: MOESM1 [file 9440472]
